# Supplementary material for: Probing the Reactions of Thiourea (CH4N2S) with Metals (X = Au, Hf, Hg, Ir, Os, W, Pt, and Re) Anchored on Fullerene Surfaces (C59X)
Source: PubMed Central journal article supplement — ACS Omega. 2022 Sep 19;7(39):35118–35. doi: 10.1021/acsomega.2c04044 (PMC9535727; doi:10.1021/acsomega.2c04044), 2022-09-19
Supplement: ao2c04044_si_001.pdf [file ao2c04044_si_001.pdf]

**Probing the reactions of thiourea ( $\text{CH}_4\text{N}_2\text{S}$ ) with metals ( $\text{X} = \text{Au, Hf, Hg, Ir, Os, W, Pt, and Re}$ ) anchored fullerene surfaces ( $\text{C}_{59}\text{X}$ )**

**Hitler Louis <sup>a,b\*\*</sup>, Destiny E. Charlie <sup>a,b</sup>, Ismail O. Amodu <sup>a,c</sup>, Innocent Benjamin <sup>a</sup>,  
Terkumur E. Gber <sup>a,b</sup> and Adedapo S. Adeyinka <sup>d\*</sup>**

<sup>a</sup>Computational and Bio-Simulation Research Group, University of Calabar, Calabar, Nigeria

<sup>b</sup>Department of Pure and Applied Chemistry, Faculty of Physical Sciences, University of Calabar, Calabar, Nigeria

<sup>c</sup>Department of Mathematics, Faculty of Physical Sciences, University of Calabar, Calabar, Nigeria

<sup>d</sup>Department of Chemical Sciences, University of Johannesburg, South-Africa-2006

\*Corresponding authors' email: [louismuzong@gmail.com](mailto:louismuzong@gmail.com) and [aadeyinka@uj.ac.za](mailto:aadeyinka@uj.ac.za)

Table S1: the result of the other observed charge transfer associated with higher perturbation energy.

| Compound           | Donor                    | Acceptor                 | E <sup>2</sup> | E(i)-E(j) | F(i,j) |
|--------------------|--------------------------|--------------------------|----------------|-----------|--------|
| C <sub>59</sub> Au | $\pi^*C_{46}-C_{47}$     | $\pi^*C_{41}-C_{42}$     | 250.1          | 0.01      | 0.081  |
|                    | $\pi^*C_{44}-C_{56}$     | $\pi^*C_{54}-C_{55}$     | 207.09         | 0.01      | 0.078  |
|                    | $\pi^*C_{46}-C_{47}$     | $\pi^*C_{40}-C_{48}$     | 186.52         | 0.02      | 0.084  |
|                    | $\pi^*C_{46}-C_{47}$     | $\pi^*C_{51}-C_{52}$     | 142.62         | 0.02      | 0.079  |
|                    | LP C <sub>53</sub>       | $\pi^*C_{61}-S_{68}$     | 113.29         | 0.16      | 0.130  |
| C <sub>59</sub> Hf | $\pi^*C_{50}-C_{51}$     | $\pi^*C_{44}-C_{52}$     | 329.59         | 0.01      | 0.085  |
|                    | $\pi^*C_{32}-C_{33}$     | $\pi^*C_{30}-C_{31}$     | 316.62         | 0.01      | 0.082  |
|                    | $\pi^*C_{50}-C_{51}$     | $\pi^*C_{45}-C_{46}$     | 201.61         | 0.01      | 0.081  |
|                    | $\pi^*C_{28}-C_{29}$     | $\pi^*C_{30}-C_{31}$     | 134.82         | 0.02      | 0.081  |
|                    | $\pi^*C_{32}-C_{33}$     | $\pi^*C_{30}-C_{31}$     | 134.62         | 0.02      | 0.081  |
|                    | Lp*C <sub>27</sub>       | $\pi C_8-C_{26}$         | 114.88         | 0.14      | 0.111  |
| C <sub>59</sub> Hg | LP*C <sub>35</sub>       | $\sigma^*C_{35}-Hg_{60}$ | 352.99         | 0.09      | 0.253  |
|                    | $\pi^*C_{26}-C_{27}$     | $\pi^*C_{28}-C_{29}$     | 241.48         | 0.02      | 0.084  |
|                    | LP Hg <sub>60</sub>      | LP*C <sub>35</sub>       | 228.33         | 1.02      | 0.482  |
|                    | $\pi^*C_{24}-C_{25}$     | $\pi^*C_{22}-C_{23}$     | 199.59         | 0.02      | 0.083  |
|                    | $\pi^*C_{24}-C_{25}$     | $\pi^*C_{10}-C_{11}$     | 189.31         | 0.02      | 0.084  |
|                    | LP*C <sub>35</sub>       | $\sigma^*C_{34}-Hg_{60}$ | 125.54         | 1.67      | 0.665  |
| C <sub>59</sub> Ir | $\sigma C_{35}-Ir_{60}$  | $\sigma^*C_{27}-Ir_{60}$ | 157.69         | 2.15      | 0.750  |
|                    | $\sigma C_{27}-Ir_{60}$  | $\sigma^*C_{35}-Ir_{60}$ | 151.90         | 2.39      | 0.780  |
|                    | $\sigma C_{27}-Ir_{60}$  | $\sigma^*C_{34}-Ir_{60}$ | 146.62         | 2.11      | 0.722  |
|                    | $\sigma C_{35}-Ir_{60}$  | $\sigma^*C_{27}-Ir_{60}$ | 128.12         | 2.42      | 0.717  |
|                    | $\pi^*C_{35}-Ir_{60}$    | $\pi^*C_{26}-C_{27}$     | 114.62         | 0.03      | 0.089  |
|                    | $\sigma C_{27}-Ir_{60}$  | $\sigma^*C_{27}-Ir_{60}$ | 104.11         | 2.11      | 0.608  |
| C <sub>59</sub> Os | $\pi^*C_{22}-C_{23}$     | $\pi^*C_{20}-C_{21}$     | 286.29         | 0.01      | 0.081  |
|                    | $\pi^*C_{24}-C_{25}$     | $\pi^*C_{10}-C_{11}$     | 268.30         | 0.01      | 0.085  |
|                    | $\sigma C_{35}-Os_{60}$  | $\sigma^*C_{27}-Os_{60}$ | 196.40         | 2.00      | 0.568  |
|                    | $\sigma C_{35}-Os_{60}$  | $\sigma^*C_{34}-Os_{60}$ | 196.27         | 2.00      | 0.568  |
|                    | $\sigma C_{27}-Os_{60}$  | $\sigma^*C_{35}-Os_{60}$ | 188.50         | 2.23      | 0.592  |
| C <sub>59</sub> Pt | $\sigma C_{27}-Pt_{60}$  | LP*C <sub>35</sub>       | 971.84         | 0.69      | 0.865  |
|                    | $\sigma C_{27}-Pt_{60}$  | $\sigma^*C_{34}-Pt_{60}$ | 600.97         | 2.63      | 1.135  |
|                    | $\sigma C_{27}-Pt_{60}$  | $\sigma^*C_{27}-Pt_{60}$ | 425.46         | 2.63      | 0.955  |
|                    | LP Pt <sub>60</sub>      | LP*C <sub>35</sub>       | 413.13         | 0.70      | 0.545  |
|                    | LP* C <sub>35</sub>      | $\sigma^*C_{27}-Pt_{60}$ | 369.79         | 1.94      | 1.044  |
|                    | $\sigma C_{27}-Pt_{60}$  | LP* C <sub>35</sub>      | 174.05         | 1.10      | 0.403  |
| C <sub>59</sub> Re | $\sigma C_{35}-Re_{60}$  | $\sigma^*C_{34}-Re_{60}$ | 814.61         | 0.37      | 1.727  |
|                    | $\sigma^*C_{34}-Re_{60}$ | $\sigma^*C_{35}-Re_{60}$ | 674.89         | 0.33      | 1.270  |
|                    | $\sigma^*C_{34}-Re_{60}$ | LP*Re <sub>60</sub>      | 355.10         | 0.69      | 1.590  |
|                    | $\sigma^*C_{27}-Re_{60}$ | LP*Re <sub>60</sub>      | 354.59         | 0.69      | 1.586  |
|                    | $\sigma^*C_{22}-C_{23}$  | $\sigma^*C_{34}-Re_{60}$ | 146.91         | 0.01      | 0.     |
|                    | $\sigma C_{35}-Re_{60}$  | $\sigma^*C_{34}-Re_{60}$ | 124.39         | 2.04      | 0.646  |
| C <sub>59</sub> W  | $\pi C_{34}-W_{60}$      | LP* C <sub>49</sub>      | 581.56         | 0.04      | 0.170  |

|                        |                                              |                                              |        |      |       |
|------------------------|----------------------------------------------|----------------------------------------------|--------|------|-------|
|                        | $\pi$ C <sub>27</sub> -W <sub>60</sub>       | LP C <sub>26</sub>                           | 580.71 | 0.04 | 0.170 |
|                        | $\pi^*$ C <sub>22</sub> -C <sub>23</sub>     | $\pi^*$ C <sub>20</sub> -C <sub>21</sub>     | 309.93 | 0.01 | 0.083 |
|                        | $\pi$ C <sub>27</sub> -W <sub>60</sub>       | $\pi^*$ C <sub>34</sub> -W <sub>60</sub>     | 216.10 | 0.76 | 0.385 |
|                        | $\pi$ C <sub>27</sub> -W <sub>60</sub>       | $\sigma$ C <sub>35</sub> -W <sub>60</sub>    | 204.15 | 0.98 | 0.428 |
|                        |                                              |                                              |        |      |       |
| TOU@C <sub>59</sub> Au | $\sigma$ N <sub>62</sub> -H <sub>63</sub>    | $\pi^*$ C <sub>61</sub> -N <sub>62</sub>     | 196.68 | 0.96 | 0.587 |
|                        | $\sigma$ N <sub>62</sub> -H <sub>64</sub>    | $\pi^*$ C <sub>61</sub> -N <sub>62</sub>     | 168.05 | 0.99 | 0.557 |
|                        | $\pi^*$ C <sub>28</sub> -C <sub>29</sub>     | $\pi^*$ C <sub>7</sub> -C <sub>8</sub>       | 158.40 | 0.01 | 0.084 |
|                        | $\sigma$ C <sub>34</sub> -Au <sub>60</sub>   | LP* Au <sub>60</sub>                         | 133.16 | 0.06 | 0.153 |
|                        | LP S <sub>68</sub>                           | $\sigma^*$ Au <sub>60</sub> -S <sub>68</sub> | 148.67 | 0.80 | 0.435 |
|                        |                                              |                                              |        |      |       |
| TOU@C <sub>59</sub> Hf | $\sigma^*$ C <sub>34</sub> -Hf <sub>60</sub> | $\sigma^*$ C <sub>27</sub> -Hf <sub>60</sub> | 691.11 | 0.03 | 0.347 |
|                        | $\sigma^*$ C <sub>27</sub> -Hf <sub>60</sub> | $\sigma^*$ C <sub>35</sub> -Hf <sub>60</sub> | 275.15 | 0.09 | 0.377 |
|                        | $\sigma^*$ C <sub>27</sub> -Hf <sub>60</sub> | $\sigma^*$ Hf <sub>60</sub> -S <sub>68</sub> | 267.85 | 0.06 | 0.344 |
|                        | $\pi^*$ C <sub>32</sub> -C <sub>33</sub>     | $\pi^*$ C <sub>30</sub> -C <sub>31</sub>     | 256.85 | 0.01 | 0.083 |
|                        | $\pi^*$ C <sub>32</sub> -C <sub>33</sub>     | $\pi^*$ C <sub>50</sub> -C <sub>51</sub>     | 247.36 | 0.01 | 0.082 |
|                        |                                              |                                              |        |      |       |
| TOU@C <sub>59</sub> Hg | $\pi^*$ C <sub>28</sub> -C <sub>29</sub>     | $\pi^*$ C <sub>30</sub> -C <sub>31</sub>     | 280.31 | 0.01 | 0.084 |
|                        | $\pi^*$ C <sub>32</sub> -C <sub>33</sub>     | $\pi^*$ C <sub>30</sub> -C <sub>31</sub>     | 265.06 | 0.01 | 0.084 |
|                        | $\pi^*$ C <sub>28</sub> -C <sub>29</sub>     | $\pi^*$ C <sub>7</sub> -C <sub>8</sub>       | 209.47 | 0.01 | 0.081 |
|                        | $\pi^*$ C <sub>32</sub> -C <sub>33</sub>     | $\pi^*$ C <sub>50</sub> -C <sub>51</sub>     | 203.86 | 0.01 | 0.081 |
|                        | LP C <sub>35</sub>                           | LP* Hg <sub>60</sub>                         | 112.75 | 0.46 | 0.206 |
|                        |                                              |                                              |        |      |       |
| TOU@C <sub>59</sub> Ir | $\pi^*$ C <sub>28</sub> -C <sub>29</sub>     | $\pi^*$ C <sub>26</sub> -C <sub>27</sub>     | 114.41 | 0.01 | 0.085 |
|                        | $\pi^*$ C <sub>32</sub> -C <sub>33</sub>     | $\pi^*$ C <sub>34</sub> -C <sub>49</sub>     | 114.41 | 0.01 | 0.085 |
|                        | $\pi^*$ C <sub>24</sub> -C <sub>25</sub>     | $\pi^*$ C <sub>26</sub> -C <sub>27</sub>     | 65.67  | 0.02 | 0.075 |
|                        | $\pi^*$ C <sub>36</sub> -C <sub>48</sub>     | $\pi^*$ C <sub>34</sub> -C <sub>49</sub>     | 65.65  | 0.02 | 0.075 |
|                        | $\sigma^*$ C <sub>35</sub> -Ir <sub>60</sub> | BD*(3)Ir <sub>60</sub> -S <sub>62</sub>      | 39.82  | 0.20 | 0.363 |
|                        |                                              |                                              |        |      |       |
| TOU@C <sub>59</sub> Os | $\pi^*$ C <sub>35</sub> -Os <sub>60</sub>    | $\sigma^*$ Os <sub>60</sub> -S <sub>68</sub> | 200.47 | 0.17 | 0.400 |
|                        | $\sigma^*$ C <sub>34</sub> -Os <sub>60</sub> | $\sigma^*$ Os <sub>60</sub> -S <sub>68</sub> | 165.59 | 0.19 | 0.399 |
|                        | $\sigma^*$ C <sub>27</sub> -Os <sub>60</sub> | $\sigma^*$ Os <sub>60</sub> -S <sub>68</sub> | 165.42 | 0.19 | 0.399 |
|                        | LP Os <sub>60</sub>                          | $\pi^*$ C <sub>35</sub> -C <sub>36</sub>     | 136.00 | 0.27 | 0.174 |
|                        | $\sigma$ C <sub>27</sub> -Os <sub>60</sub>   | $\sigma^*$ C <sub>27</sub> -Os <sub>60</sub> | 101.37 | 1.06 | 0.200 |
|                        |                                              |                                              |        |      |       |
| TOU@C <sub>59</sub> Pt | LP Pt <sub>60</sub>                          | LP*S <sub>62</sub>                           | 572.76 | 0.17 | 0.321 |
|                        | $\pi^*$ C <sub>39</sub> -C <sub>47</sub>     | $\pi^*$ C <sub>45</sub> -C <sub>46</sub>     | 237.58 | 0.01 | 0.082 |
|                        | $\pi^*$ C <sub>10</sub> -C <sub>11</sub>     | $\pi^*$ C <sub>4</sub> -C <sub>9</sub>       | 237.51 | 0.01 | 0.082 |
|                        | $\sigma$ C <sub>35</sub> -Pt <sub>60</sub>   | LP Pt <sub>60</sub>                          | 141.37 | 0.13 | 0.171 |
|                        | LP Pt <sub>60</sub>                          | $\pi^*$ C <sub>61</sub> -S <sub>62</sub>     | 136.41 | 0.42 | 0.222 |
|                        |                                              |                                              |        |      |       |
| TOU@C <sub>59</sub> Re | $\sigma$ C <sub>61</sub> -N <sub>62</sub>    | BD*(3)C <sub>61</sub> -S <sub>68</sub>       | 156.16 | 1.43 | 0.618 |
|                        | $\sigma$ C <sub>27</sub> -Re <sub>60</sub>   | $\sigma^*$ C <sub>34</sub> -Re <sub>60</sub> | 138.14 | 1.35 | 0.557 |
|                        | $\sigma$ C <sub>34</sub> -Re <sub>60</sub>   | $\sigma^*$ C <sub>27</sub> -Re <sub>60</sub> | 136.45 | 1.35 | 0.553 |
|                        | $\sigma$ C <sub>27</sub> -Re <sub>60</sub>   | $\sigma^*$ C <sub>35</sub> -Re <sub>60</sub> | 124.63 | 1.07 | 0.475 |
|                        | $\sigma$ C <sub>34</sub> -Re <sub>60</sub>   | $\sigma^*$ C <sub>35</sub> -Re <sub>60</sub> | 124.05 | 1.07 | 0.474 |
|                        |                                              |                                              |        |      |       |
| TOU@C <sub>59</sub> W  | $\pi^*$ C <sub>35</sub> -W <sub>60</sub>     | $\pi^*$ C <sub>36</sub> -C <sub>48</sub>     | 257.07 | 0.01 | 0.083 |
|                        | $\pi^*$ C <sub>35</sub> -W <sub>60</sub>     | $\pi^*$ C <sub>24</sub> -C <sub>25</sub>     | 257.06 | 0.01 | 0.083 |

|  |                         |                         |        |      |       |
|--|-------------------------|-------------------------|--------|------|-------|
|  | $\sigma^*C_{27}-W_{60}$ | $\sigma^*W_{60}-S_{62}$ | 193.32 | 0.51 | 0.803 |
|  | $\sigma^*C_{34}-W_{60}$ | $\sigma^*W_{60}-S_{62}$ | 193.27 | 0.51 | 0.803 |
|  | $\sigma^*C_{35}-W_{60}$ | $\sigma^*W_{60}-S_{62}$ | 140.09 | 0.57 | 0.744 |
